# Supplementary material for: Efflorescence kinetics of sodium carbonate decahydrate: a universal description as a function of temperature, degree of reaction, and water vapor pressure
Source: Royal Society of Chemistry journal article supplement (doi:10.1039/d3cp04000c), 2023-01-01
Supplement: d3cp04000c1.pdf [file d3cp04000c1.pdf]

# Efflorescence kinetics of sodium carbonate decahydrate: A universal description as a function of temperature, degree of reaction, and water vapor pressure

Mito Hotta, Yuto Zushi, Shun Iwasaki, Shunsuke Fukunaga, and Nobuyoshi Koga\*

Department of Science Education, Division of Educational Sciences, Graduate School of Humanities and Social Sciences, Hiroshima University, 1-1-1 Kagamiyama, Higashi-Hiroshima 739-8524, Japan

## Contents

|                                                                                                                                                                                                                                                                                                                                                                                                                                                                                                                                                                                                                                                                                                                                                                                                                                                                                                                                                |    |
|------------------------------------------------------------------------------------------------------------------------------------------------------------------------------------------------------------------------------------------------------------------------------------------------------------------------------------------------------------------------------------------------------------------------------------------------------------------------------------------------------------------------------------------------------------------------------------------------------------------------------------------------------------------------------------------------------------------------------------------------------------------------------------------------------------------------------------------------------------------------------------------------------------------------------------------------|----|
| S1. Kinetic data and formal kinetic analysis .....                                                                                                                                                                                                                                                                                                                                                                                                                                                                                                                                                                                                                                                                                                                                                                                                                                                                                             | s2 |
| <b>Figure S1.</b> Kinetic curves of the thermal dehydration of SC-DH to form SC-MH in a stream of N <sub>2</sub> -H <sub>2</sub> O mixed gas having different $p(\text{H}_2\text{O})$ values: (a) 0.56 kPa, (b) 0.97 kPa, (c) 1.50 kPa, and (d) 2.00 kPa. ....                                                                                                                                                                                                                                                                                                                                                                                                                                                                                                                                                                                                                                                                                 | s2 |
| <b>Figure S2.</b> Friedman plots at various $\alpha$ values for the thermal dehydration of SC-DH to form SC-MH in a stream of N <sub>2</sub> -H <sub>2</sub> O mixed gas having different $p(\text{H}_2\text{O})$ values: (a) 0.56 kPa, (b) 0.97 kPa, (c) 1.50 kPa, and (d) 2.00 kPa. ....                                                                                                                                                                                                                                                                                                                                                                                                                                                                                                                                                                                                                                                     | s3 |
| S2. Kinetic analysis considering the effect of atmospheric $p(\text{H}_2\text{O})$ .....                                                                                                                                                                                                                                                                                                                                                                                                                                                                                                                                                                                                                                                                                                                                                                                                                                                       | s4 |
| <b>Figure S3.</b> A model of the interfacial reaction of the thermal dehydration of inorganic hydrates comprising five elementary steps: (1) formation of H <sub>2</sub> O vacancy (V(H <sub>2</sub> O)) in the reactant phase and interstitial H <sub>2</sub> O (H <sub>2</sub> O( <i>i</i> )) at the internal reaction interface (int) of the solid reactant–solid product; (2) diffusion of H <sub>2</sub> O( <i>i</i> ) from the internal interface to the external interface (ext) of solid product–atmosphere characterized by the diffusion coefficient $D$ and diffusion length $l_0$ ; (3) conversion of H <sub>2</sub> O( <i>i</i> ) to H <sub>2</sub> O molecules adsorbed to the solid product at the external interface; (4) desorption of absorbed H <sub>2</sub> O (H <sub>2</sub> O(abs)) at the external interface; (5) consumption of V(H <sub>2</sub> O) to form the solid product at the internal reaction interface. .... | s4 |
| <b>Figure S4.</b> Extended Friedman plots for the thermal dehydration of SC-DH to form SC-MH at $\alpha = 0.5$ with fixed ( $a, b$ ) values in the AF (Eq. (13)): (a) ( $a, b$ ) = (0, 1), (b) ( $a, b$ ) = (1, 1), (c) ( $a, b$ ) = (9, 9), and (d) ( $a, b$ ) = (2, 2). ....                                                                                                                                                                                                                                                                                                                                                                                                                                                                                                                                                                                                                                                                 | s4 |
| <b>Figure S5.</b> Results of the extended Friedman plots obtained by optimizing exponents ( $a, b$ ) in Eq. (13) under the condition of $a \neq b$ : (a) typical extended Friedman plot at $\alpha = 0.5$ with ( $a, b$ ) = (2.22, 5.04), (b) extended Friedman plots at various $\alpha$ values, (c) optimized ( $a, b$ ) values at various $\alpha$ values, and (d) $E_a$ values at various $\alpha$ values. ....                                                                                                                                                                                                                                                                                                                                                                                                                                                                                                                            | s5 |
| S3. Kinetic analysis considering the effect of self-generated $p(\text{H}_2\text{O})$ .....                                                                                                                                                                                                                                                                                                                                                                                                                                                                                                                                                                                                                                                                                                                                                                                                                                                    | s6 |
| <b>Figure S6.</b> Results of the extended Friedman plots across data points at different $p(\text{H}_2\text{O})$ values including those in a stream of dry N <sub>2</sub> ( $p(\text{H}_2\text{O})_{\text{ATM}} \approx 0$ ), examined with previously optimized $a = b = 2.10$ and $d$ values (Figure 8) and by optimizing $c$ in Eq. (15): (a) typical extended Friedman plot at $\alpha = 0.5$ with optimized ( $c, d$ ) = (17.25, 1.10), (b) extended Friedman plots at various $\alpha$ values, (c) optimized $c$ and $d$ values at various $\alpha$ values, and (d) $E_a$ values at various $\alpha$ values. ....                                                                                                                                                                                                                                                                                                                        | s6 |
| <b>Figure S7.</b> Variation in the results of the extended Friedman plots across data points at different $p(\text{H}_2\text{O})$ values including those in flowing dry N <sub>2</sub> ( $p(\text{H}_2\text{O})_{\text{ATM}} \approx 0$ ), accompanied by repeated optimizations of $a = b$ values and subsequently $c$ value: (a) typical extended Friedman plot at $\alpha = 0.5$ , (b) optimized $c$ values at various $\alpha$ values, and (c) $E_a$ values at various $\alpha$ values. ....                                                                                                                                                                                                                                                                                                                                                                                                                                               | s7 |

---

\* Corresponding author.

E-mail addresses: nkoga@hiroshima-u.ac.jp (N. Koga)

## S1. Kinetic data and formal kinetic analysis

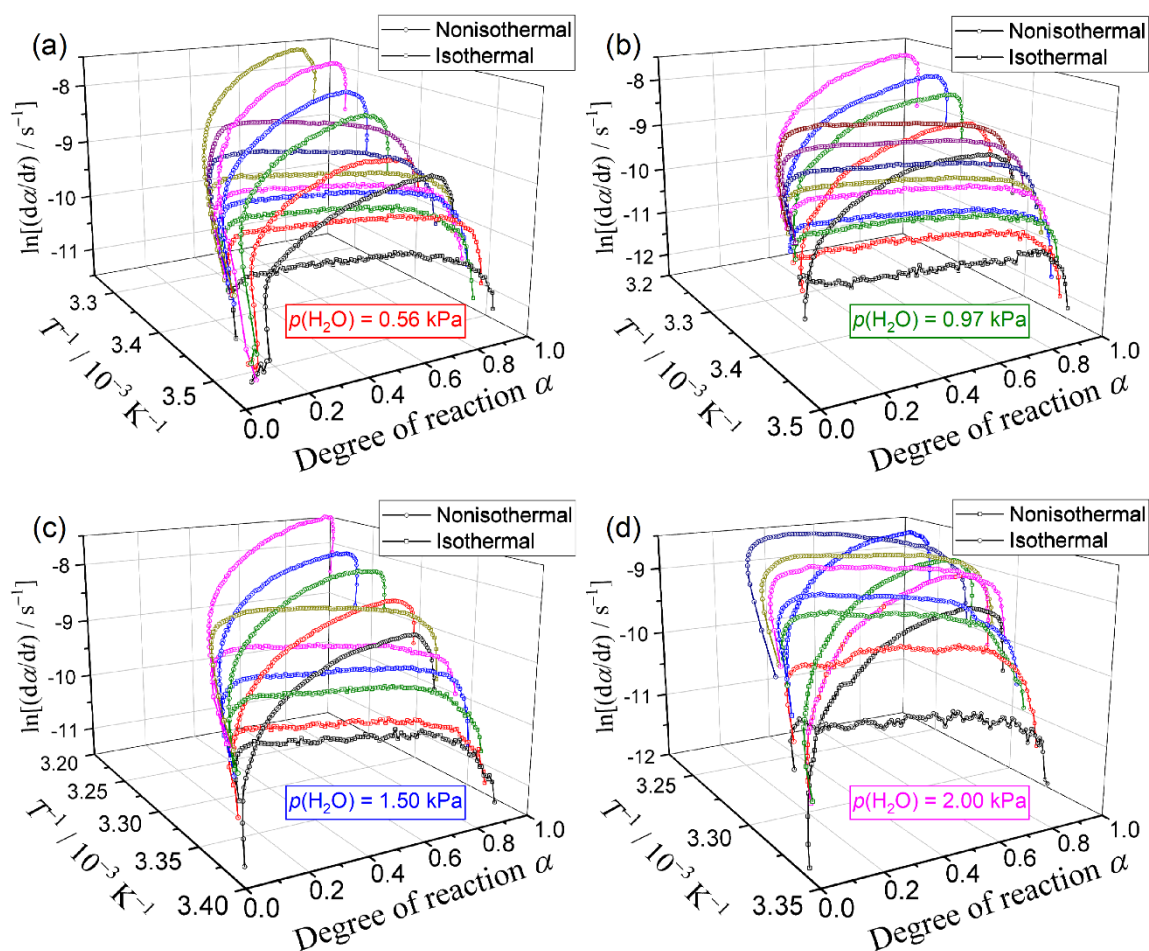

**Figure S1.** Kinetic curves of the thermal dehydration of SC-DH to form SC-MH in a stream of  $N_2$ - $H_2O$  mixed gas having different  $p(H_2O)$  values: (a) 0.56 kPa, (b) 0.97 kPa, (c) 1.50 kPa, and (d) 2.00 kPa.

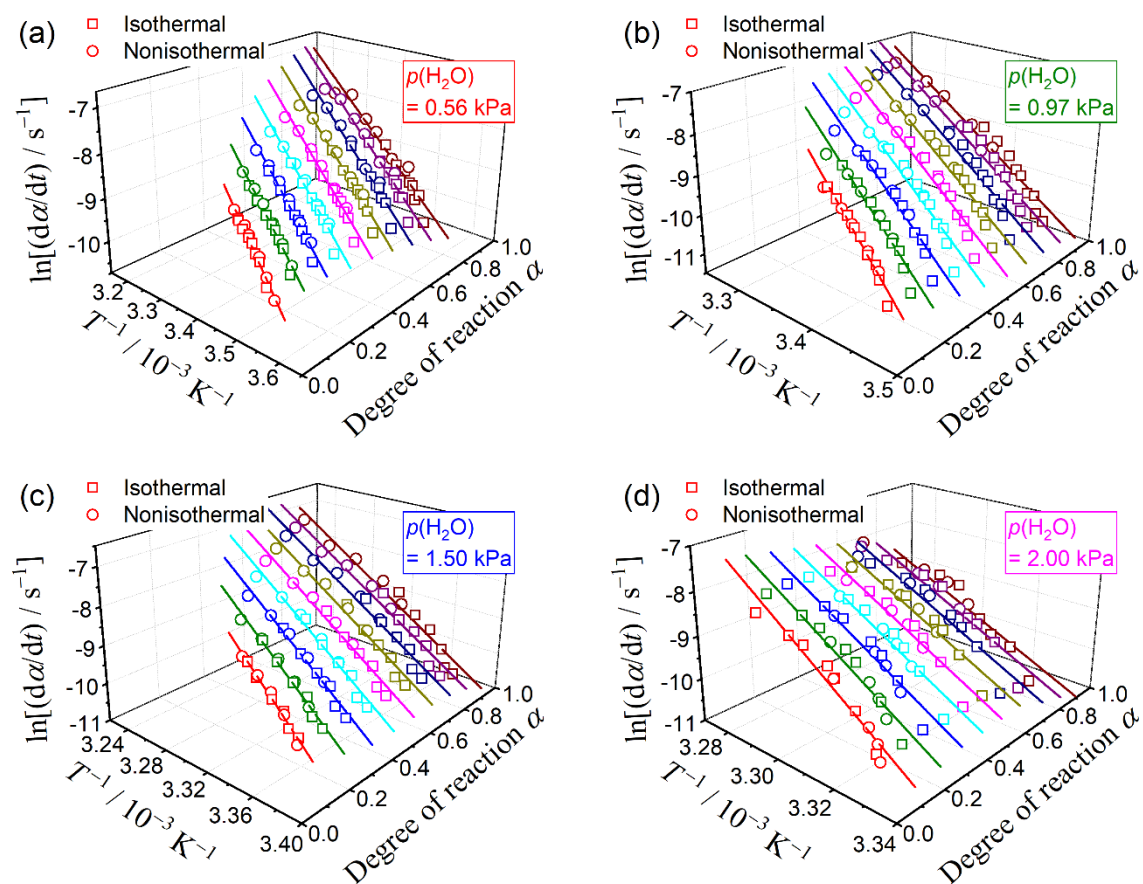

**Figure S2.** Friedman plots at various  $\alpha$  values for the thermal dehydration of SC-DH to form SC-MH in a stream of  $N_2$ - $H_2O$  mixed gas having different  $p(H_2O)$  values: (a) 0.56 kPa, (b) 0.97 kPa, (c) 1.50 kPa, and (d) 2.00 kPa.

S2. Kinetic analysis considering the effect of atmospheric  $p(\text{H}_2\text{O})$ 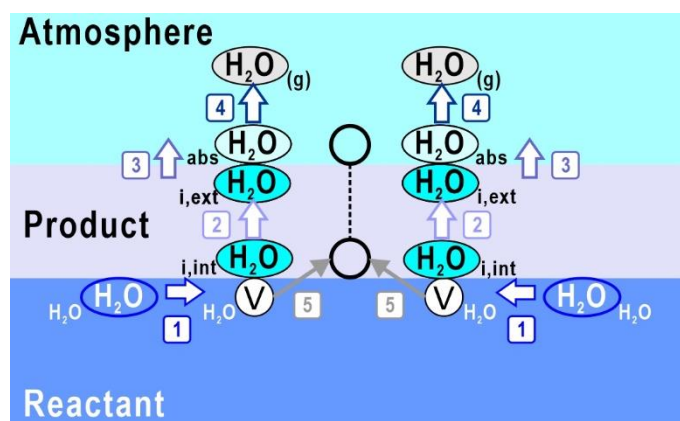

**Figure S3.** A model of the interfacial reaction of the thermal dehydration of inorganic hydrates comprising five elementary steps: (1) formation of  $\text{H}_2\text{O}$  vacancy ( $\text{V}(\text{H}_2\text{O})$ ) in the reactant phase and interstitial  $\text{H}_2\text{O}$  ( $\text{H}_2\text{O}(i)$ ) at the internal reaction interface (int) of the solid reactant–solid product; (2) diffusion of  $\text{H}_2\text{O}(i)$  from the internal interface to the external interface (ext) of solid product–atmosphere characterized by the diffusion coefficient  $D$  and diffusion length  $l_0$ ; (3) conversion of  $\text{H}_2\text{O}(i)$  to  $\text{H}_2\text{O}$  molecules adsorbed to the solid product at the external interface; (4) desorption of adsorbed  $\text{H}_2\text{O}$  ( $\text{H}_2\text{O}(\text{abs})$ ) at the external interface; (5) consumption of  $\text{V}(\text{H}_2\text{O})$  to form the solid product at the internal reaction interface.

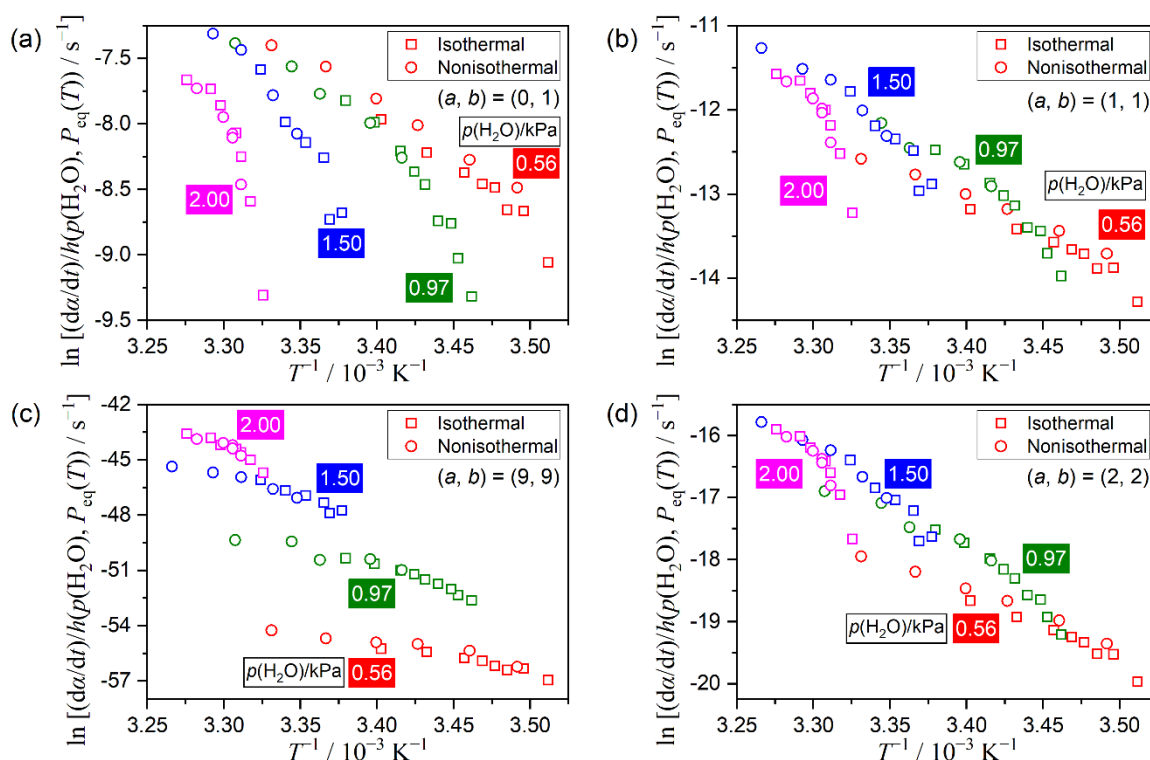

**Figure S4.** Extended Friedman plots for the thermal dehydration of SC-DH to form SC-MH at  $\alpha = 0.5$  with fixed  $(a, b)$  values in the AF (Eq. (13)): (a)  $(a, b) = (0, 1)$ , (b)  $(a, b) = (1, 1)$ , (c)  $(a, b) = (9, 9)$ , and (d)  $(a, b) = (2, 2)$ .

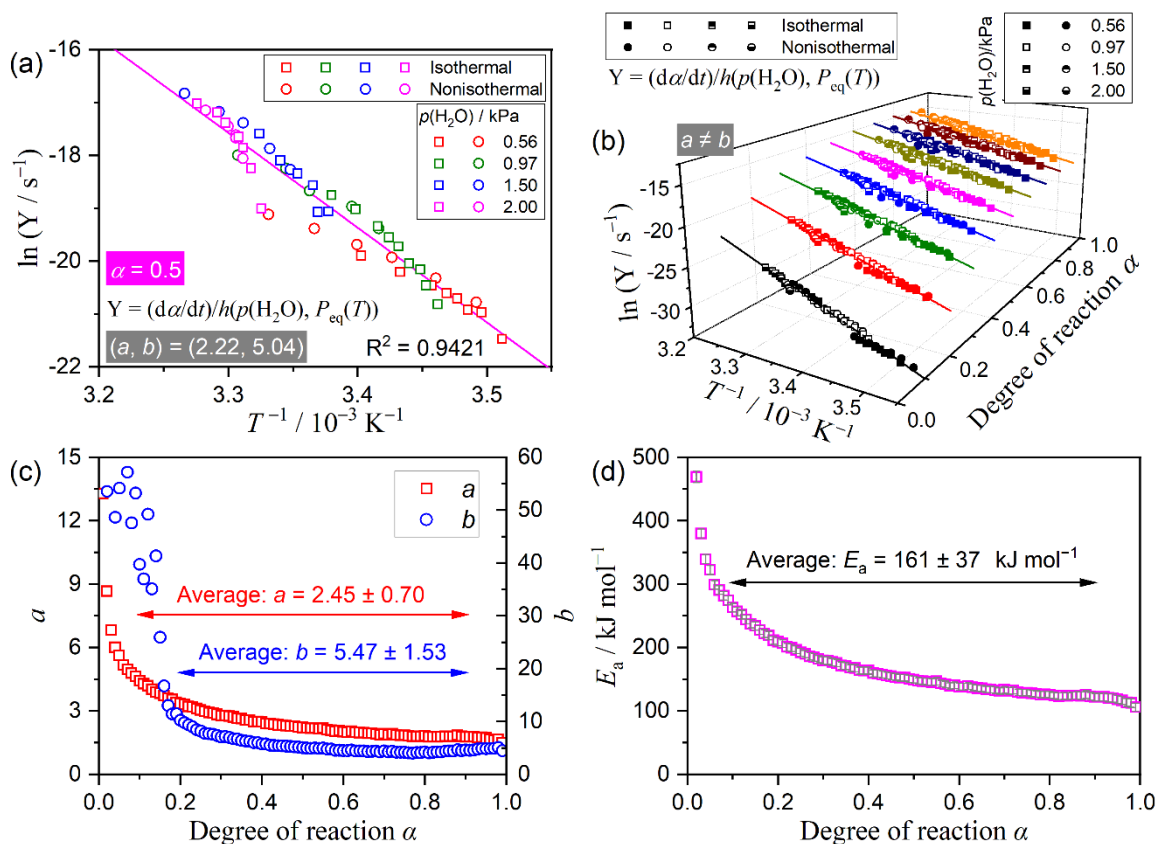

**Figure S5.** Results of the extended Friedman plots obtained by optimizing exponents ( $a$ ,  $b$ ) in Eq. (13) under the condition of  $a \neq b$ : (a) typical extended Friedman plot at  $\alpha = 0.5$  with  $(a, b) = (2.22, 5.04)$ , (b) extended Friedman plots at various  $\alpha$  values, (c) optimized  $(a, b)$  values at various  $\alpha$  values, and (d)  $E_a$  values at various  $\alpha$  values.

S3. Kinetic analysis considering the effect of self-generated  $p(\text{H}_2\text{O})$ 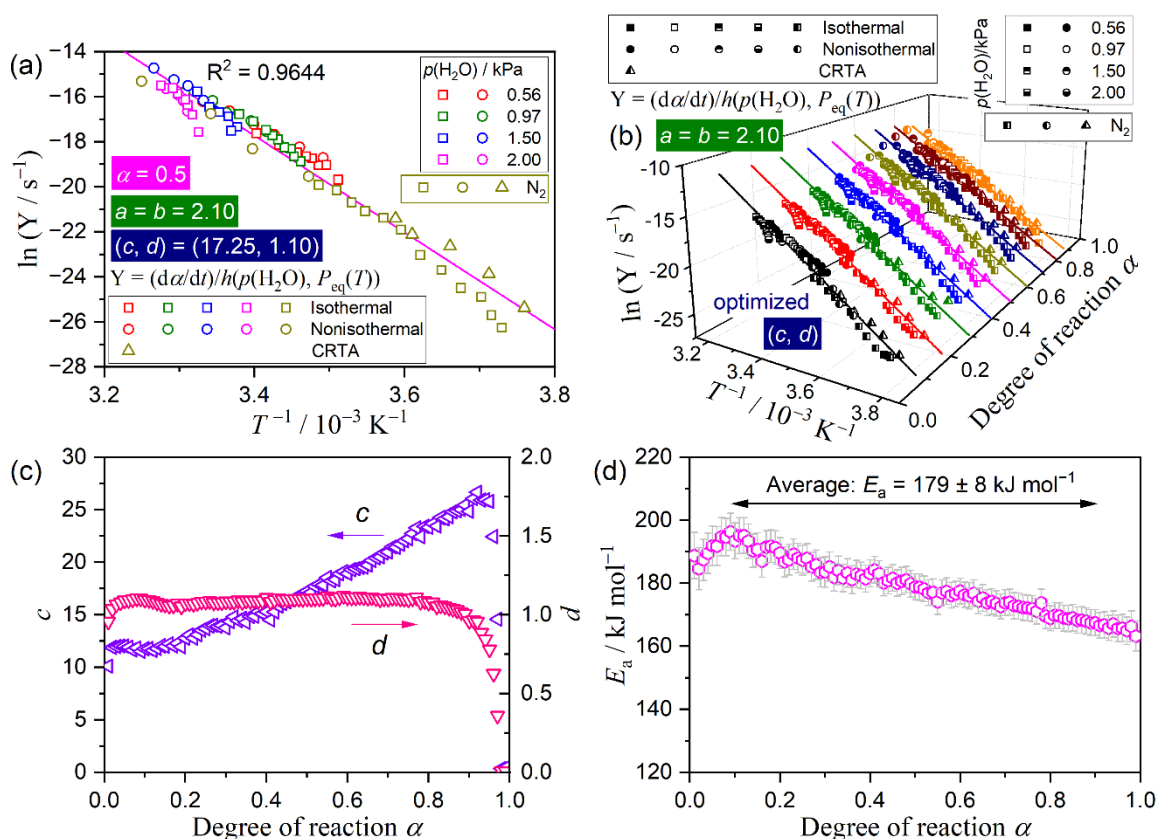

**Figure S6.** Results of the extended Friedman plots across data points at different  $p(\text{H}_2\text{O})$  values including those in a stream of dry  $\text{N}_2$  ( $p(\text{H}_2\text{O})_{\text{ATM}} \approx 0$ ), examined with previously optimized  $a = b = 2.10$  and  $d$  values (Figure 8) and by optimizing  $c$  in Eq. (15): (a) typical extended Friedman plot at  $\alpha = 0.5$  with optimized  $(c, d) = (17.25, 1.10)$ , (b) extended Friedman plots at various  $\alpha$  values, (c) optimized  $c$  and  $d$  values at various  $\alpha$  values, and (d)  $E_a$  values at various  $\alpha$  values.

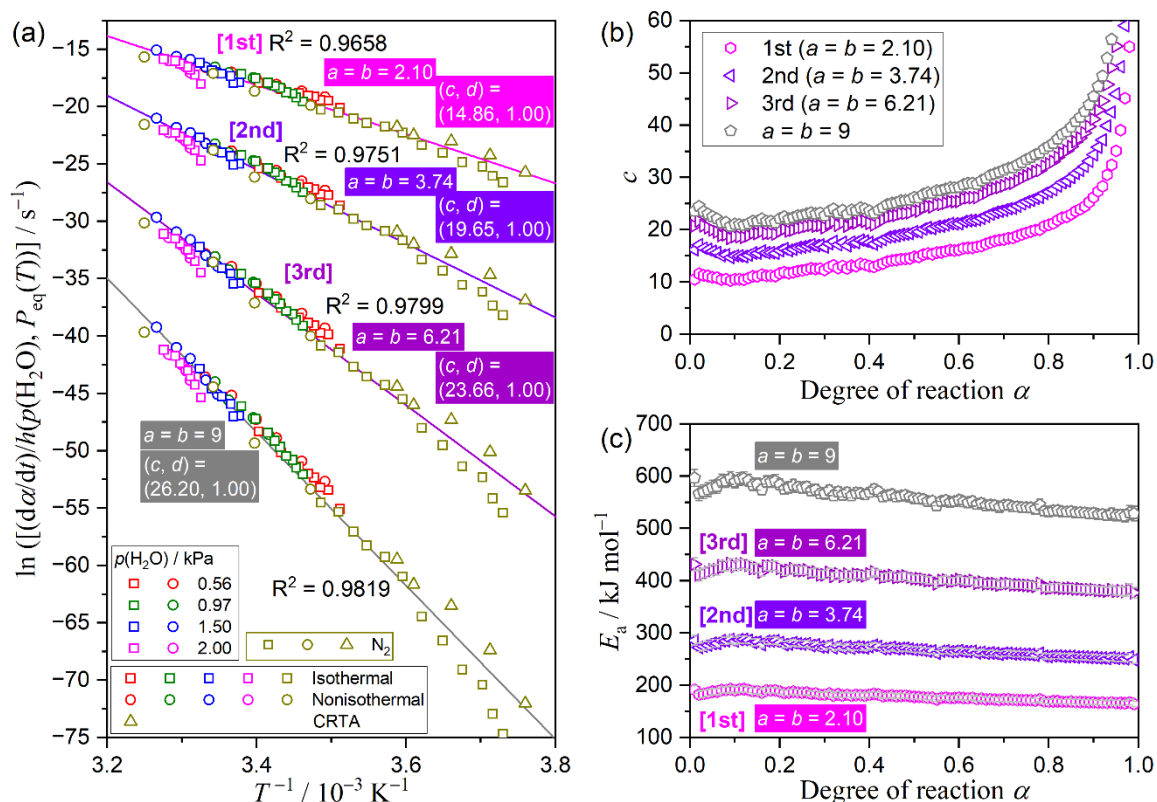

**Figure S7.** Variation in the results of the extended Friedman plots across data points at different  $p(\text{H}_2\text{O})$  values including those in flowing dry  $\text{N}_2$  ( $p(\text{H}_2\text{O})_{\text{ATM}} \approx 0$ ), accompanied by repeated optimizations of  $a = b$  values and subsequently  $c$  value: (a) typical extended Friedman plot at  $\alpha = 0.5$ , (b) optimized  $c$  values at various  $\alpha$  values, and (c)  $E_a$  values at various  $\alpha$  values.
